# Supplementary material for: Bio-Augmentation of Cupriavidus sp. CY-1 into 2,4-D Contaminated Soil: Microbial Community Analysis by Culture Dependent and Independent Techniques
Source: PLOS journal article supplement (doi:10.1371/journal.pone.0145057), 2015-12-28
Supplement: S1 (10.1371/journal.pone.0145057.s001) [file journal.pone.0145057.s001]

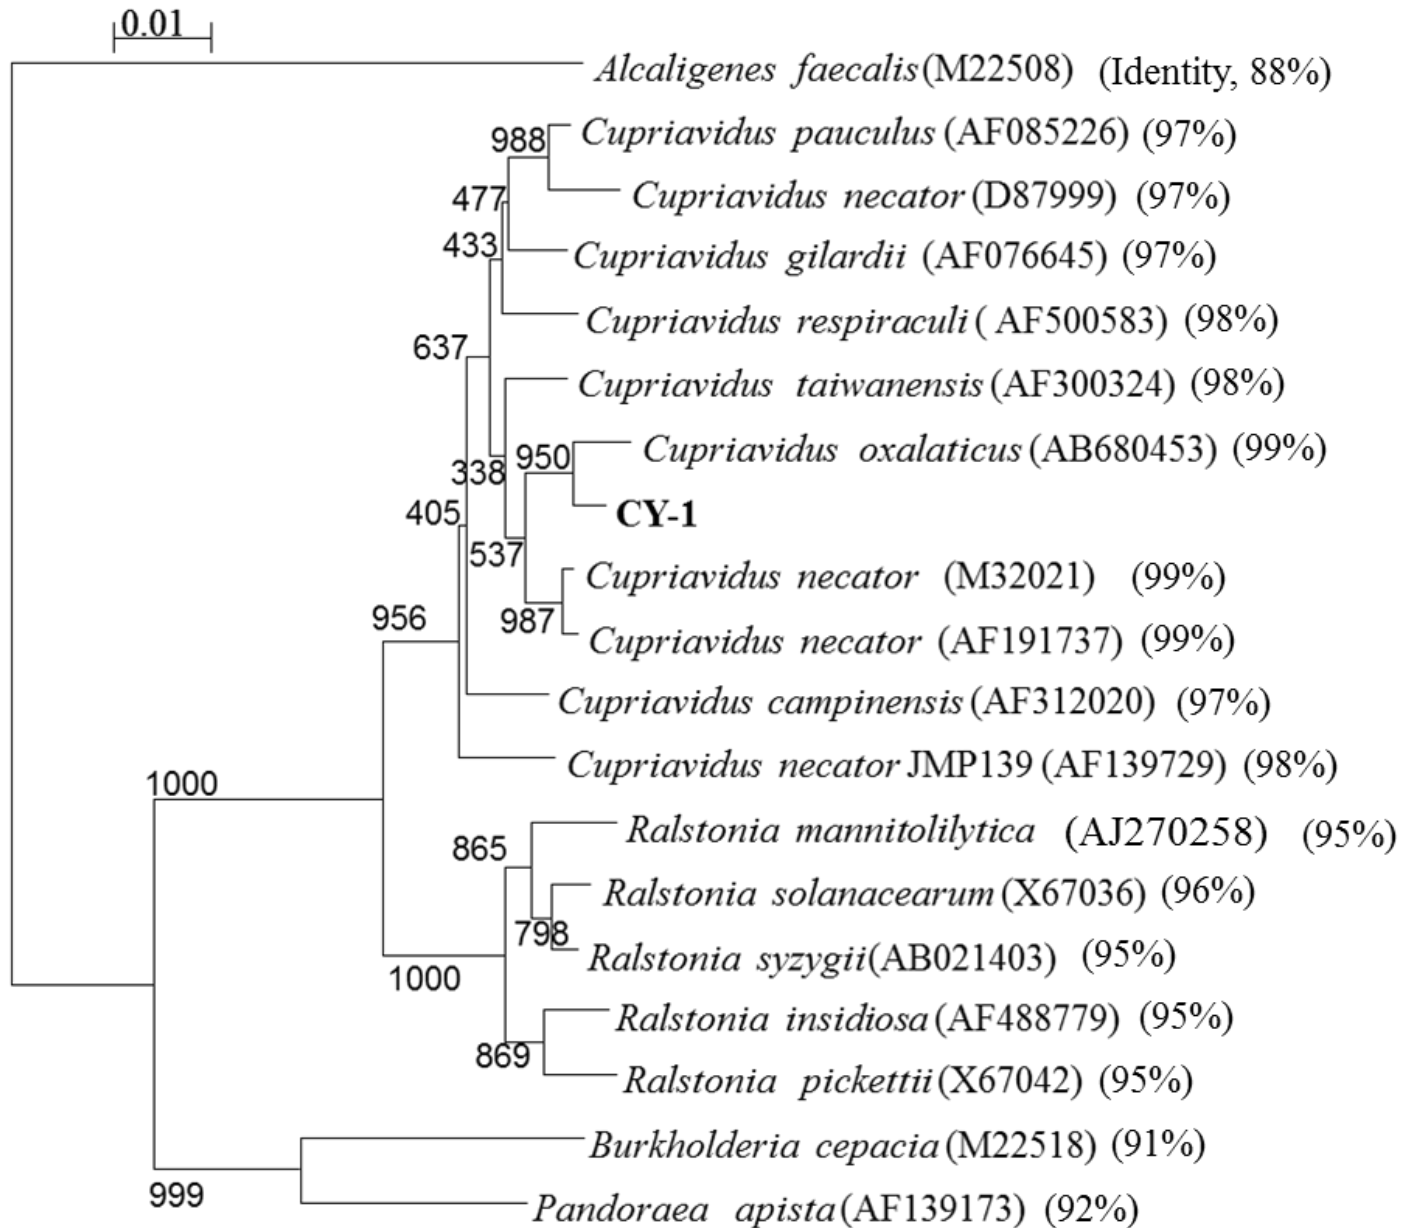

**S1 Fig.** A neighbor-joining tree constructed using Mega 6.0 showing the phylogenetic relationship of 16S rDNA sequences of isolated strain *Cupriavidus* sp. CY-1 from closely related sequences from GenBank. Accession numbers at the GenBank of National Center for Biotechnology Information (NCBI) are shown in parenthesis.
