# Supplementary material for: Bio-Augmentation of Cupriavidus sp. CY-1 into 2,4-D Contaminated Soil: Microbial Community Analysis by Culture Dependent and Independent Techniques
Source: PLOS journal article supplement (doi:10.1371/journal.pone.0145057), 2015-12-28
Supplement: S2 (10.1371/journal.pone.0145057.s002) [file journal.pone.0145057.s002]

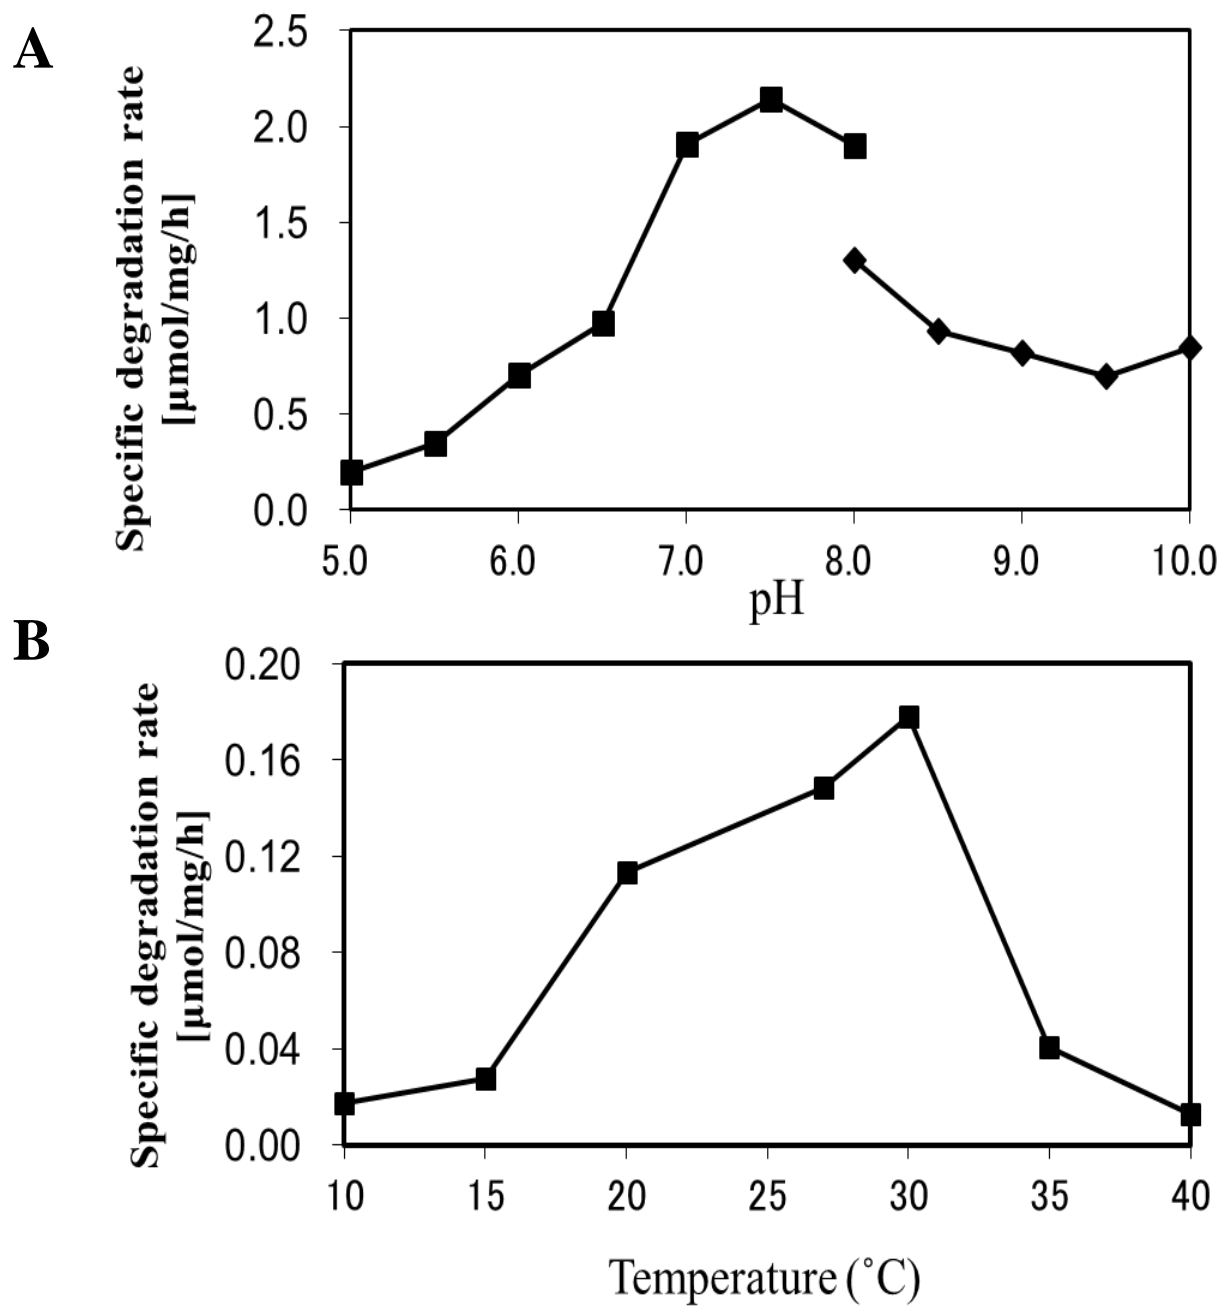

**S2 Fig. Effect of (A) pH and (B) temperature on 2,4-D degradation.** To evaluate the effect of pH and temperature on 2,4-D degradation, the enzyme extracts were prepared with ultrapure water, phosphate buffer, or Tris-HCl buffer.
