# Supplementary material for: Bio-Augmentation of Cupriavidus sp. CY-1 into 2,4-D Contaminated Soil: Microbial Community Analysis by Culture Dependent and Independent Techniques
Source: PLOS journal article supplement (doi:10.1371/journal.pone.0145057), 2015-12-28
Supplement: S3 (10.1371/journal.pone.0145057.s003) [file journal.pone.0145057.s003]

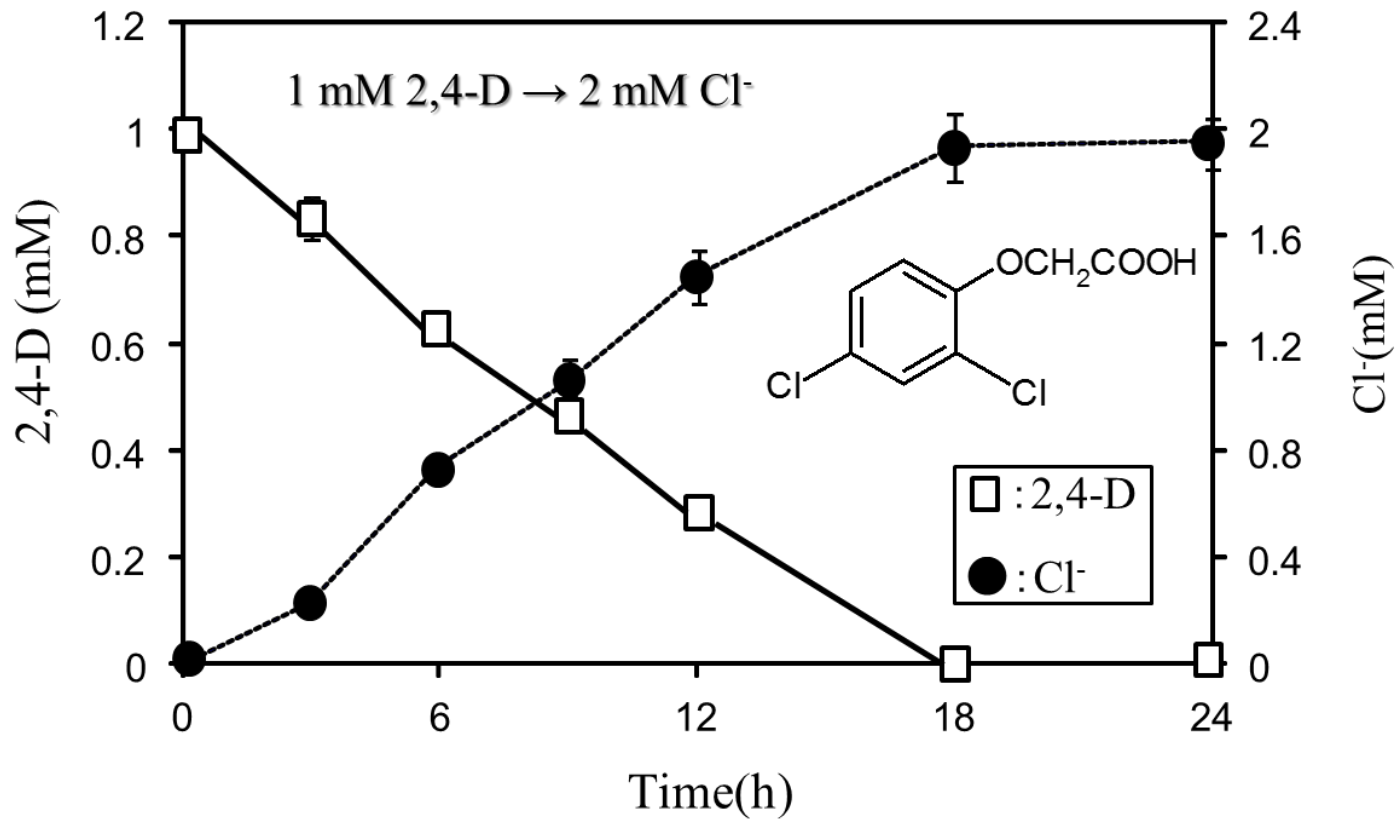

**S3 Fig. Release of chloride ions during 2,4-D degradation.** Chloride ions were measured by using Dionex ICS-1000 Ion chromatography.
